# Supplementary material for: Anti-Anxiety Effect of (−)-Syringaresnol-4-O-β-d-apiofuranosyl-(1→2)-β-d-glucopyranoside from Albizzia julibrissin Durazz (Leguminosae)
Source: Molecules. 2017 Aug 11;22(8):1331. doi: 10.3390/molecules22081331 (PMC6152026; doi:10.3390/molecules22081331)
Supplement: Supplementary file 1 [file molecules-22-01331-s001.xlsx]

## Sheet: OFT and EPM
the number of central entries in the OFT
Vehicle	DZP	0.9	1.8	3.6	Stress
8	5	2	1	4	2
3	2	3	3	6	1
3	3	6	1	5	5
7	8	3	3	1	0
9	5	2	7	4	2
4	6	4	3	3	3
10	7	0	2	2	2
4	5	6	7	6	2
8	2	5	7	6	1
	2	4	3	3	4
the time spent in central areas in the OFT
Vehicle	DZP	0.9	1.8	3.6	Stress
37.25	21.2	9.14	2.29	14.52	3.05
27.92	9.92	4.1	29.93	37.99	1.38
17.55	10.78	18.55	5.21	33	24.57
20.91	46.28	10.58	4.01	31.43	0
17.24	21.3	22.52	31.47	5.48	11.98
21.29	34.99	21.12	11.77	13.67	9.24
35.16	50.01	0	21.36	5.44	11.53
10.76	17.05	28.47	32.16	40.84	11.57
24.39	14.24	14.09	46.06	34.7	3.16
	7.9	32.11	14.54	6.85	16.28
the open arm entries in the EPM
Vehicle	DZP	0.9	1.8	3.6	Stress
0.38	0.65	0.46	0.54	0.58	0.29
0.67	0.65	0.63	0.55	0.41	0.42
0.57	0.66	0.3	0.38	0.45	0.2
0.72	0.35	0.31	0.46	0.44	0.17
0.61	0.3	0.3	0.42	0.35	0.16
0.38	0.41	0.43	0.32	0.31	0.38
0.27	0.16	0.16	0.38	0.38	0.35
0.29	0.45	0.31	0.37	0.23	0.29
0.43	0.43	0.11	0.13	0.41	0.32
	0.33	0.29	0.16	0.36	0.17
the percentage of time spent in open arms in the EPM
Vehicle	DZP	0.9	1.8	3.6	Stress
0.28	0.21	0.15	0.08	0.34	0.04
0.35	0.33	0.55	0.39	0.28	0.03
0.16	0.51	0.13	0.4	0.31	0.06
0.48	0.25	0.33	0.46	0.33	0.07
0.24	0.26	0.09	0.29	0.3	0.03
0.58	0.27	0.41	0.14	0.11	0.22
0.22	0.23	0.2	0.17	0.31	0.31
0.27	0.25	0.23	0.34	0.06	0.19
0.4	0.3	0.03	0.04	0.15	0.32
	0.31	0.11	0.07	0.29	0.08

## Sheet: CRF,ACTH and CORT
Effect of SAG on serum CRF levels
Vehicle	DZP	0.9	1.8	3.6	Stress
8.832	4.802	6.145	5.1	2.314	6.891
6.244	5.001	5.797	5.05	3.856	13.011
9.08	5.349	4.553	6.195	6.444	14.055
4.901	6.742	6.742	9.429	11.916	8.483
6.593	6.444	9.628	8.682	8.284	10.921
5.797	5.647	8.036	7.488	7.488	12.613
7.588	7.14	11.07	8.235	6.145	10.274
9.329	6.891	9.528	6.294	9.13	11.568
7.687	10.672	11.667	10.075	9.379	8.085
6.891	10.225	9.578	11.518	9.429	9.379
Effect of SAG on serum ACTH levels
Vehicle	DZP	0.9	1.8	3.6	Stress
8.111	11.091	14.553	8.014	10.322	14.841
11.091	9.168	15.514	13.88	10.034	16.476
7.918	9.553	17.245	12.726	8.784	17.726
8.976	13.399	13.976	15.322	11.861	11.668
12.341	10.13	16.957	15.034	10.514	15.13
9.841	10.13	13.495	11.187	10.226	9.264
7.726	11.091	14.745	13.111	14.745	9.649
9.841	10.034	12.149	18.207	11.668	10.899
8.687	13.207	11.476	11.668	12.437	27.437
10.13	12.341	9.361	10.611	10.995	28.399
Effect of SAG on serum CORT levels
Vehicle	DZP	0.9	1.8	3.6	Stress
53.67	43	66.56	74.11	56.33	70.56
54.11	46.11	41.67	47.89	54.11	99.89
41.67	45.67	39.44	45.67	46.11	95.89
55	51.89	46.11	63.89	48.78	75.89
86.11	54.11	57.67	53.22	58.56	68.78
80.78	65.67	59.89	66.56	54.56	78.56
62.56	57.22	57.22	67	50.11	99.44
67.44	73.67	60.78	83.89	62.11	113.67
94.56	61.67	83	52.33	54.56	110.56
98.11	104.33	92.33	66.11	60.78	85.67

## Sheet: monoamine neurotransmitters
Effect of SAG on the NE in the cerebral cortex of rats							Effect of SAG on the NE in the hippocampus of rats
Vehicle	DZP	0.9	1.8	3.6	Model		Vehicle	DZP	0.9	1.8	3.6	Model
154.62	137.21	148.21	152.52	139.04	185.28		142.47	138.16	155.61	116.82	140.3	193.04
117.77	119.99	172.72	152.67	136.57	155.67		189.26	132.96	142.11	136.03	141.56	201.18
128.29	103.01	194.39	150.86	153.58	198.65		137.33	130.97	192.07	126.57	141.11	197.12
126.99	141.17	153.06	160.98	138.24	251.52		161.76	133.59	138.75	126.75	159.87	185.71
123.76	129.1	108.44	176.88	128.19	198.56		112.2	101.67	113.43	148.63	169.97	179.12
116.66	127.63	199.42	209.39	124.59	162.26		159.96	113.17	167.03	169.72	157.6	156.31
124.63	119.97	157.39	177.63	130.18	183.63		144.04	123.16	122.99	127.96	137.84	105.37
148.88	123.48	257.82	142.18	146.5	150.6		116.54	129.71	150.61	141.25	7.6	155.35
115.38	141.38	132.32	161.88	124.97	188.81		182.18	137.4	197.93	147.53	165.75	205.6
56.52	154.84	150.68	158	139.15	213.68		141.35	100.52		149.61	132.09	432.71
Effect of SAG on the DA in the cerebral cortex of rats							Effect of SAG on the DA in the hippocampus of rats
Vehicle	DZP	0.9	1.8	3.6	Model		Vehicle	DZP	0.9	1.8	3.6	Model
49.47	34.93	63.38	74.07	67.05	50.15		26.38	21.6	33.5	32.33	32.57	33.41
27.92	61.61	16.83	49.21	38.51	13.59		25.5	28.96	28.49	31.55	21.77	31.19
21.84	55.55	29.76	44.86	64.61	77.62		23.64	19.06	27.88	26.18	25.08	27.66
40.9	13.07	89.03	57.14	22.97	69.42		34.31	18.3	32.01	29.39	24.28	35.05
23.37	51.74	57.77	53.1	39.27	89.63		32.84	27.57	25.7	39.95	27.86	25.31
51.48	34.56	56.45	18.07	56.28	72.88		22.1	24.99	28.05	22.65	25.27	27.01
50.42	54.72	46.75	54.19	41.55	60.97		28.97	21.3	31.86	23.04	28.39	22.66
48.72	77.95	72.71	56.97	56.52	57.03		20.76	23.07	31.2	29.41	19.97	22
66.51	25.99	53.5	62.14	35.03	74.02		47.52	24.32	13.89	23.72	28.55	45.05
12.71	38.69	68.23	59.51	45.83	87.13		21.65	28.53		26.68	30.77	32.87
Effect of SAG on the DOPAC in the cerebral cortex of rats							Effect of SAG on the DOPAC in the hippocampus of rats
Vehicle	DZP	0.9	1.8	3.6	Model		Vehicle	DZP	0.9	1.8	3.6	Model
24.62	43.64	45.3	47.45	48.06	50.7		19.22	21.69	14.79	21.29	18.99	20.04
43.19	15.2	22.48	10.43	51.22	52.75		18.71	17.8	16.68	17.14	25.11	16.76
25.85	41.46	40.6	46.58	46.92	66.87		13.46	14.14	36.26	15.23	17.59	33.94
19.29	66.11	55.16	60.34	8.41	43.81		20.99	9.58	16.79	14.31	10.77	12.93
25.31	44.67	45.83	46.64	37.94	33.31		24.13	14.98	16.01	15.21	11.92	13.97
51.54	42.72	47.36	38.68	35.45	53.07		15.06	15.26	27.57	12.74	14.07	16.74
20.42	26.13	47.91	44.33	38.77	47		20.25	13.95	17.01	18.3	16.76	14.78
53.5	38.31	52.46	41.36	37.43	82.67		13.91	11.07	16.54	17.51	10.21	31.41
56.95	29.5	60.06	36.81	63.84	35.31		25.34	12.7	17.66	62.78	15.1	41.63
39.25	36.26	41.54	43.36	38.37	29.6		16.02	16.59		20.27	18.74	38.74
Effect of SAG on the HVA in the cerebral cortex of rats							Effect of SAG on the HVA in the hippocampus of rats
Vehicle	DZP	0.9	1.8	3.6	Model		Vehicle	DZP	0.9	1.8	3.6	Model
37.2	37.28	33.62	42.34	40.55	41.95		14.6	11.18	21.42	11.03	15.21	12.09
26.09	43.54	48.36	16.21	11.7	65.14		21.64	9.25	22.62	9.67	19.43	11.41
43.54	35.48	51.97	46.69	32.42	61.46		14.22	21.88	19.87	10.09	24.54	11.34
15.52	8.01	35.62	52.54	45.09	37.5		16.46	10.63	12.62	7.64	13.12	7.76
30.5	27.45	41.14	39.9	41.88	29.28		20.8	13.28	14.33	15.7	12.37	11.14
31.07	32.42	13.47	41.2	28.55	48.09		18.84	8.51	17.32	7.91	19.91	13.97
30.36	36.5	42.55	24.89	33.98	35.58		12.75	13.79	22.31	10.52	12.78	8.08
28.61	31.64	39.16	31.53	30.6	78.15		16.14	11.68	11.75	12.25	9.67	13.93
40.02	50.69	30.06	34.76	38.13	51.02		43.9	10.62	14.07	29.96	10.05	50.71
57.38	10.22	43.01	34.6	37.11	29.45		14.18	8.64		18.07	10.06	24.24
Effect of SAG on the 5-HT in the cerebral cortex of rats							Effect of SAG on the 5-HT in the hippocampus of rats
Vehicle	DZP	0.9	1.8	3.6	Model		Vehicle	DZP	0.9	1.8	3.6	Model
34.23	16.68	22.37	14.67	19.16	20.97		26.24	29.51	24.36	17.21	23.66	60.2
15.12	12.44	18.07	12.08	23.32	27.07		20.05	25.51	19.88	19.33	21.43	25.23
20.67	14.29	16.89	23.84	15.86	40.82		18.83	13.46	18.52	17.11	21.88	22.17
23.18	14.31	21.36	17.35	12.3	20.24		33.41	12.04	38.05	22.23	11.59	39.38
14.84	14.95	24.92	16.94	19.95	22.76		32.43	18.44	11.8	18.45	15.47	58.93
17.91	16.23	17.47	18.69	13.57	24.75		10.2	22.23	11.63	20.78	15.9	37.68
19.64	15.72	25.09	18.13	20.04	29.11		27.1	19.36	12.49	12.19	23.64	26.09
24.63	21.3	22.91	20.87	19.2	36.15		17.5	14.3	45.71	22.7	13.71	23.7
18.55	19.13	18.28	17.43	13.8	20.65		40.1	17.85	49.37	23.22	21.42	63.83
14.29	10.63	24.02	18.88	19.76	37.8		8.54	23.03		28.56	26.27	28.47
Effect of SAG on the 5-HIAA in the cerebral cortex of rats							Effect of SAG on the 5-HIAA in the hippocampus of rats
Vehicle	DZP	0.9	1.8	3.6	Model		Vehicle	DZP	0.9	1.8	3.6	Model
51.9	37.28	47.66	52.54	40.55	55.18		69.93	67.42	77.71	72.65	95.07	130.31
33.03	43.54	53.81	43.65	11.7	62.94		85.71	75.02	70.59	74.61	65.2	91.17
52.96	35.48	53.06	53.66	32.42	75.47		65.62	76.26	74.37	91.89	77.82	107.48
63.37	8.01	66.94	63.67	45.09	58.02		85.18	61.76	89.78	102.1	94.88	84.45
35.2	27.45	49.2	42.05	41.88	44.7		61.52	85.31	94.04	62.75	49.97	98.66
44.07	32.42	52.03	48.92	28.55	48.15		77.27	82.84	81.18	76.21	85.1	79.12
39.83	36.5	55.46	41.48	33.98	57.32		71.78	75.85	106	69.13	66.84	69.12
45.43	31.64	62.38	48.47	30.6	80.54		68.11	69.31	97.64	98.14	84.85	71.28
60.98	50.69	57.55	45.7	38.13	41.67		83.9	69.69	84.18	14.29	82.82	97.24
54.28	10.22	54.05	69.06	37.11	57.52		73.83	61.92		149.5	67.42	124.64
